# Supplementary material for: Telomere Length is Not a Main factor for the Development of Islet Autoimmunity and Type 1 Diabetes in the TEDDY Study
Source: Research Square preprint supplement (doi:10.21203/rs.3.rs-1018251/v1), 2021-11-17
Supplement: Supplementary file 1 [file 175eeec5649d4aaf1abade3b.docx]

**The TEDDY Study Group**

**Colorado Clinical Center:** Marian Rewers, M.D., Ph.D., PI1,4,6,9,10, Aaron Barbour, Kimberly Bautista11, Judith Baxter8,911, Daniel Felipe-Morales, Brigitte I. Frohnert, M.D.2,13, Marisa Stahl, M.D.12, Patricia Gesualdo2,6,11,13, Rachel Haley, Michelle Hoffman11,12,13, Rachel Karban11, Edwin Liu, M.D.12, Alondra Munoz, Jill Norris, Ph.D.2,3,11, Stesha Peacock, Hanan Shorrosh, Andrea Steck, M.D.3,13, Megan Stern11, Kathleen Waugh6,7,11. University of Colorado, Anschutz Medical Campus, Barbara Davis Center for Childhood Diabetes.

**Finland Clinical Center:** Jorma Toppari, M.D., Ph.D., PI¥^1,4,10,13,Olli G. Simell, M.D., Ph.D., Annika Adamsson, Ph.D.^11, Sanna-Mari Aaltonen^, Suvi Ahonen*±§, Mari Åkerlund*±§, Leena Hakola*±, Anne Hekkala, M.D.µ¤, Henna Holappaµ¤, Heikki Hyöty, M.D., Ph.D.*±6, Anni Ikonenµ¤, Jorma Ilonen, M.D., Ph.D.¥¶3, Sanna Jokipuu^, Leena Karlsson^, Jukka Kero M.D., Ph.D.¥^3, 13, Miia Kähönenµ¤11,13, Mikael Knip, M.D., Ph.D.*±, Minna-Liisa Koivikkoµ¤, Katja Kokkonen*±, Merja Koskinen*±, Mirva Koreasalo*±§2, Kalle Kurppa, M.D., Ph.D.*±12, Salla Kuusela, M.D.* ±, Jarita Kytölä*±, Sinikka Lahtinen*±, Jutta Laiho, Ph.D.*6, Tiina Latva-ahoµ¤, Laura Leppänen^, Katri Lindfors, Ph.D.*12, Maria Lönnrot, M.D., Ph.D.*±6, Elina Mäntymäki^, Markus Mattila*±, Maija Miettinen§2, Katja Multasuoµ¤, Teija Mykkänenµ¤, Tiina Niininen±*11, Sari Niinistö§2, Mia Nyblom*±, Sami Oikarinen, Ph.D.*±6, Paula Ollikainenµ¤ , Zhian Othmani¥, Sirpa Pohjola µ¤, Jenna Rautanen±§, Anne Riikonen*±§2, Minna Romo^, Satu Simell, M.D., Ph.D.¥12, Aino Steniusµ¤11, Päivi Tossavainen, M.D.µ¤, Mari Vähä-Mäkilä¥, Eeva Varjonen^11, Riitta Veijola, M.D., Ph.D.µ¤13, Irene Viinikangasµ¤, Suvi M. Virtanen, M.D., Ph.D.*±§2. ¥University of Turku, *Tampere University, µUniversity of Oulu, ^Turku University Hospital, Hospital District of Southwest Finland, ±Tampere University Hospital, ¤Oulu University Hospital, §Finnish Institute for Health and Welfare, Finland, ¶University of Kuopio.

**Georgia/Florida Clinical Center:** Jin-Xiong She, Ph.D., PI1,3,4,10, Desmond Schatz, M.D.*4,7,8, Diane Hopkins11, Leigh Steed11,12,13, Jennifer Bryant11, Katherine Silvis2, Michael Haller, M.D.*13, Melissa Gardiner11, Richard McIndoe, Ph.D., Ashok Sharma, Stephen W. Anderson, M.D.^, Laura Jacobsen, M.D.*13, John Marks, DHSc.*11,13, P.D. Towe*. Center for Biotechnology and Genomic Medicine, Augusta University. *University of Florida, Pediatric Endocrinology. ^Pediatric Endocrine Associates, Atlanta.

**Germany Clinical Center:** Anette G. Ziegler, M.D., PI1,3,4,10, Ezio Bonifacio Ph.D.*, Cigdem Gezginci, Anja Heublein, Eva Hohoff¥2, Sandra Hummel, Ph.D.2, Annette Knopff7, Charlotte Koch, Sibylle Koletzko, M.D.¶12, Claudia Ramminger11, Roswith Roth, Ph.D.8, Jennifer Schmidt, Marlon Scholz, Joanna Stock8,11,13, Katharina Warncke, M.D.13, Lorena Wendel, Christiane Winkler, Ph.D.2,11. Forschergruppe Diabetes e.V. and Institute of Diabetes Research, Helmholtz Zentrum München, Forschergruppe Diabetes, and Klinikum rechts der Isar, Technische Universität München. *Center for Regenerative Therapies, TU Dresden, ¶Dr. von Hauner Children’s Hospital, Department of Gastroenterology, Ludwig Maximillians University Munich, ¥University of Bonn, Department of Nutritional Epidemiology.

**Sweden Clinical Center:** Åke Lernmark, Ph.D., PI1,3,4,5,6,8,9,10, Daniel Agardh, M.D., Ph.D.6,12, Carin Andrén Aronsson, Ph.D.2,11,12, Maria Ask, Rasmus Bennet, Corrado Cilio, Ph.D., M.D.6, Susanne Dahlberg, Malin Goldman Tsubarah, Emelie Ericson-Hallström, Annika Björne Fors, Lina Fransson, Thomas Gard, Monika Hansen, Susanne Hyberg, Berglind Jonsdottir, M.D., Ph.D.11, Helena Elding Larsson, M.D., Ph.D.6,13, Marielle Lindström, Markus Lundgren, M.D., Ph.D.13, Marlena Maziarz, Ph.D., Maria Månsson Martinez, Jessica Melin11, Zeliha Mestan, Caroline Nilsson, Yohanna Nordh, Kobra Rahmati, Anita Ramelius, Falastin Salami, Anette Sjöberg, Carina Törn, Ph.D.3, Ulrika Ulvenhag, Terese Wiktorsson, Åsa Wimar13. Lund University.

**Washington Clinical Center:** William A. Hagopian, M.D., Ph.D., PI1,3,4,6,7,10,12,13, Michael Killian6,7,11,12, Claire Cowen Crouch11,13, Jennifer Skidmore2, Christian Chamberlain, Brelon Fairman, Arlene Meyer, Jocelyn Meyer, Denise Mulenga11, Nole Powell, Jared Radtke, Shreya Roy, Davey Schmitt, Sarah Zink. Pacific Northwest Research Institute.

**Pennsylvania Satellite Center:** Dorothy Becker, M.D., Margaret Franciscus, MaryEllen Dalmagro-Elias Smith2, Ashi Daftary, M.D., Mary Beth Klein, Chrystal Yates. Children’s Hospital of Pittsburgh of UPMC.

**Data Coordinating Center:** Jeffrey P. Krischer, Ph.D., PI1,4,5,9,10, Rajesh Adusumali, Sarah Austin-Gonzalez, Maryouri Avendano, Sandra Baethke, Brant Burkhardt, Ph.D.6, Martha Butterworth2, Nicholas Cadigan, Joanna Clasen, Kevin Counts, Christopher Eberhard, Steven Fiske8, Laura Gandolfo, Jennifer Garmeson, Veena Gowda, Belinda Hsiao, Christina Karges, Qian Li, Ph.D.2,3, Shu Liu, Xiang Liu, Ph.D.2,3,8,13, Kristian Lynch, Ph.D. 6,8, Jamie Malloy, Cristina McCarthy11, Jose Moreno, Hemang M. Parikh, Ph.D.3,8, Cassandra Remedios, Chris Shaffer, Susan Smith11, Noah Sulman, Ph.D., Roy Tamura, Ph.D.1,2,11,12,13, Dena Tewey, Michael Toth, Ulla Uusitalo, Ph.D.2, Kendra Vehik, Ph.D.4,5,6,8,13, Ponni Vijayakandipan, Melissa Wroble, Jimin Yang, Ph.D., R.D.2, Kenneth Young, Ph.D. *Past staff: Michael Abbondondolo, Lori Ballard, Rasheedah Brown, David Cuthbertson, Stephen Dankyi, David Hadley, Ph.D., Kathleen Heyman, Francisco Perez Laras, Hye-Seung Lee, Ph.D., Colleen Maguire, Wendy McLeod, Aubrie Merrell, Steven Meulemans, Ryan Quigley, Laura Smith, Ph.D.8,11.* University of South Florida.

**Project scientist:** Beena Akolkar, Ph.D.1,3,4,5,6,7,9,10. National Institutes of Diabetes and Digestive and Kidney Diseases.

**Autoantibody Reference Laboratories:** Liping Yu, M.D.^5, Dongmei Miao, M.D.^, Kathleen Gillespie*5, Alistair Williams*, Kyla Chandler*, Ilana Kelland*, Yassin Ben Khoud*, Matthew Randell *. ^Barbara Davis Center for Childhood Diabetes, University of Colorado Denver, *Bristol Medical School, University of Bristol, UK.

**Genetics Laboratory:** Stephen S. Rich, Ph.D.3, Wei-Min Chen, Ph.D.3, Suna Onengut-Gumuscu, Ph.D.3, Emily Farber, Rebecca Roche Pickin, Ph.D., Jonathan Davis, Jordan Davis, Dan Gallo, Jessica Bonnie, Paul Campolieto. Center for Public Health Genomics, University of Virginia.

**HLA Reference Laboratory:** William Hagopian3, MD, PhD, Christian Chamberlain, Jared Radtke, Sarah Zink. Pacific Northwest Research Institute, Seattle WA. (Previously Henry Erlich, Ph.D.3, Steven J. Mack, Ph.D., Anna Lisa Fear. Center for Genetics, Children’s Hospital Oakland Research Institute.)

**Repository:** Sandra Ke, Niveen Mulholland, Ph.D. NIDDK Biosample Repository at Fisher BioServices.

**Other contributors:** Thomas Briese, Ph.D.6, Columbia University. Todd Brusko, Ph.D.5, University of Florida. Suzanne Bennett Johnson, Ph.D.8,11, Florida State University. Eoin McKinney, Ph.D.5, University of Cambridge. Tomi Pastinen, M.D., Ph.D.5, The Children’s Mercy Hospital. Eric Triplett, Ph.D.6, University of Florida.

***Committees:***

1Ancillary Studies, 2Diet, 3Genetics, 4Human Subjects/Publicity/Publications, 5Immune Markers, 6Infectious Agents, 7Laboratory Implementation, 8Psychosocial, 9Quality Assurance, 10Steering, 11Study Coordinators, 12Celiac Disease, 13Clinical Implementation.
